**Title:** EpiSemoLLM: A Fine-tuned Large Language Model for Epileptogenic Zone Localization Based on Seizure Semiology with a Performance Comparable to Epileptologists

**Authors (Tentative order):** **Shihao Yang**, MS, Department of Systems and Enterprises, Stevens Institute of Technology; **Yaxi Luo**, BS, Department of Computer Science, Stevens Institute of Technology; **Meng Jiao**, MS, Department of Systems and Enterprises, Stevens Institute of Technology; **Neel Fotedar**, MD, Department of Neurology, University Hospitals Cleveland Medical Center, School of Medicine at Case Western Reserve University; **Vikram R. Rao**, MD, PhD, Department of Neurology and Weill Institute for Neurosciences, University of California San Francisco; **Xinglong Ju**, PhD, Dixie L. Leavitt School of Business, Southern Utah University. **Shasha Wu**, MD, PhD, Department of Neurology, University of Chicago; **Xiaochen Xian**, PhD, H. Milton Stewart School of Industrial and Systems Engineering, Georgia Tech; **Hai Sun**, MD, PhD, Department of Neurosurgery, Rutgers Robert Wood Johnson Medical School, Rutgers University; **Ioannis Karakis**, MD, PhD, Department of Neurology, Emory University; School of Medicine and Department of Neurology, University of Crete School of Medicine; **Danilo Bernardo**, MD, Department of Neurology and Weill Institute for Neurosciences, University of California San Francisco; **Josh Laing**, MD, Department of Neuroscience, Monash University; **Patrick Kwan**, PhD, MD, Department of Neuroscience, Monash University; **Felix Rosenow**, MD, MHBA, Epilepsy Center Frankfurt Rhine-Main, Department of Neurology; Goethe-University Frankfurt; **Feng Liu**, PhD, Department of Systems and Enterprises, Stevens Institute of Technology; Semcer Center for Healthcare Innovation, Stevens Institute of Technology.

Senior Authors: TBD.

Corresponding Author: Feng Liu, PhD, Department of Systems and Enterprises, Stevens Institute of Technology, 07030 Hoboken, United States. Tel: 201-216-8009, Fax: 201-216-5541, Email: [fliu22@stevens.edu](mailto:fliu22@stevens.edu).

### **Withdrawal statement**

medRxiv has withdrawn this manuscript due to a duplicate posting of manuscript number MEDRXIV/2024/307955. Therefore, this work should not be cited as reference for the project. If you have any questions, please contact the corresponding author. The correct preprint can be found at doi: [10.1101/2024.05.26.24307955](https://doi.org/10.1101/2024.05.26.24307955)
